# Supplementary material for: Unraveling intractable water conflicts: the entanglement of science and politics in decision-making on large hydraulic infrastructure
Source: Copernicus journal article supplement (doi:10.5194/hess-24-4903-2020), 2020-10-19
Supplement: Supplementary file 1 [file hess-24-4903-2020-supplement.pdf]

Supplement of Hydrol. Earth Syst. Sci., 24, 4903–4921, 2020  
<https://doi.org/10.5194/hess-24-4903-2020-supplement>  
© Author(s) 2020. This work is distributed under  
the Creative Commons Attribution 4.0 License.

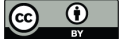

*Supplement of*

## **Unraveling intractable water conflicts: the entanglement of science and politics in decision-making on large hydraulic infrastructure**

**Jonatan Godinez-Madrigal et al.**

*Correspondence to:* Jonatan Godinez-Madrigal ([j.godinezmadriral@gmail.com](mailto:j.godinezmadriral@gmail.com))

The copyright of individual parts of the supplement might differ from the CC BY 4.0 License.

## Supplementary material 1. Detailed information of Guadalajara, León and Los Altos.

**Table S1: Comparison of water demand and supply for Guadalajara, León and Los Altos (Source: CEA Jalisco, 2018; INEGI 2015; SAPAL, 2018; SIAPA, 2017; UNOPS, 2017)**

|                                | Population <sup>1</sup> | Total water supplied and per capita                                    | Water source                                                                                                                                                                                                                                                                                                                            | Over-exploitation of aquifers <sup>2</sup>                               |
|--------------------------------|-------------------------|------------------------------------------------------------------------|-----------------------------------------------------------------------------------------------------------------------------------------------------------------------------------------------------------------------------------------------------------------------------------------------------------------------------------------|--------------------------------------------------------------------------|
| <b>León</b>                    | 1.5 million             | 2.56 m <sup>3</sup> /s<br>(81 hm <sup>3</sup> /year)<br>140 l/cap/d    | – <b>Aquifers</b> 2.42 m <sup>3</sup> /s<br>(76.6 hm <sup>3</sup> /year) 95.3%<br>– <b>Palote Dam</b> 0.13 m <sup>3</sup> /year<br>(4.2 hm <sup>3</sup> /year) 4.7%                                                                                                                                                                     | Deficit in Valle de León and Romita aquifers = 177 hm <sup>3</sup> /year |
| <b>Guadalajara<sup>3</sup></b> | 4.2 million             | 9.97 m <sup>3</sup> /s<br>(313 hm <sup>3</sup> /year)<br>207 l/cap/day | – <b>Lake Chapala</b> 5.97 m <sup>3</sup> /s<br>(188.5 hm <sup>3</sup> /year) 60%<br>– <b>Aquifers</b> 2.72 m <sup>3</sup> /s<br>(85.8 hm <sup>3</sup> /year) 27%<br>– <b>Calderón Dam</b> 1.1 m <sup>3</sup> /s<br>(35.4 hm <sup>3</sup> /year) 11%<br>– <b>Local springs</b> 0.14 m <sup>3</sup> /s<br>(4.6 hm <sup>3</sup> /year) 2% | Deficit in Atemajac and Toluquilla aquifers = 84.5 hm <sup>3</sup> /year |
| <b>Los Altos</b>               | 0.8 million             | 4.6 m <sup>3</sup> /s<br>(146 hm <sup>3</sup> /year)<br>493 l/cap/d    | – <b>Groundwater</b> 1.49 m <sup>3</sup> /s<br>(46.9 hm <sup>3</sup> /year)<br>– <b>Surface water</b> 3.14 m <sup>3</sup> /s<br>(99 hm <sup>3</sup> /year)                                                                                                                                                                              | Deficit in 17 aquifers = 155 hm <sup>3</sup> /year                       |

1. This data is from 2015, the latest official data available.
2. The overexploitation counts all aquifer users, including agriculture and industry.
3. We consider only the municipalities of Guadalajara, Zapopan, Tonalá and Tlaquepaque.

## References

- CEA Jalisco: Disponibilidad Media Anual De Aguas Subterráneas En Acuíferos Del Estado De Jalisco De Acuerdo Con Lo Publicado En El Diario Oficial De La Federación (DOF) El Día 4 De Enero De 2018. Available at: <https://www.ceajalisco.gob.mx/contenido/acuiferos/> (Accessed: 28 May 2018), 2018.
- INEGI: Encuesta intercensal 2015. Available at: <https://www.inegi.org.mx/programas/intercensal/2015/default.html>, 2015.
- SAPAL: Agua Potable. Available at: <http://www.sapal.gob.mx/servicios/aguapotable> (Accessed: 20 May 2018), 2018.
- SIAPA: Informe de Actividades Anual 2017. Available at: [http://www.siapa.gob.mx/sites/default/files/doctrans/informe\\_de\\_actividades\\_-\\_anual\\_2017.pdf](http://www.siapa.gob.mx/sites/default/files/doctrans/informe_de_actividades_-_anual_2017.pdf), 2017.
- UNOPS: 12. Análisis de las demandas hídricas en la cuenca. Available at: <http://201.131.6.193:8001/JaliscoSostenible/informe/>, 2017.

## Supplementary material 2. Detailed information on the key actors in the conflict.

Figure 4 show the position of key actors vis-à-vis the Zapotillo dam project. Each actor's position depended on some factors described in Table S2. If an actor is a key and direct stakeholder of the project, lobbied for or against the project, and has publicly condemned or be in favor of the project, it is at the extreme of the spectrum.

**Table S2. Detailed information on the key actors in the conflict.**

| <b>Actor</b>                                               | <b>Sector</b> | <b>Position</b>                                                                                                                                                                                                                                                                                                                                                                                                                                                              |
|------------------------------------------------------------|---------------|------------------------------------------------------------------------------------------------------------------------------------------------------------------------------------------------------------------------------------------------------------------------------------------------------------------------------------------------------------------------------------------------------------------------------------------------------------------------------|
| <b>Universidad de Guanajuato</b>                           | Academy       | Although the university has not released any public position on the project, many of their academics and research groups have positioned themselves against the project, arguing that the project is not a reliable solution for León's water scarcity.                                                                                                                                                                                                                      |
| <b>Acción Colectiva</b>                                    | NGO           | This NGO's area of influence is Guanajuato and promotes democratization of decision-making on water resources. They are against the project because they see it as an imposition.                                                                                                                                                                                                                                                                                            |
| <b>Guanajuato's government and State water authorities</b> | Government    | This actor has been consistently lobbying for the project throughout many administrations since the 1990s.                                                                                                                                                                                                                                                                                                                                                                   |
| <b>León municipality and SAPAL</b>                         | Government    | This is León's water utility; it has publicly declared to be in favour of the Zapotillo project, because it considers it central to the city's future water security.                                                                                                                                                                                                                                                                                                        |
| <b>Guanajuato's business associations</b>                  | Social actor  | Most of Guanajuato's business associations have publicly declared their support for the Zapotillo project, arguing that it is instrumental for León's development.                                                                                                                                                                                                                                                                                                           |
| <b>ITESO (Jesuit University of Guadalajara)</b>            | Academy       | This university has publicly released their position against the project, arguing that it is not based on principles of Integrated Water Resources Management nor respect to human rights, and that Mexican society should transit to a new water management approach based on demand management, instead of large infrastructure.                                                                                                                                           |
| <b>Universidad de Guadalajara</b>                          | Academy       | This university has publicly released their position against the project, arguing that the project is unfeasible based on the increasing water scarcity and higher temperatures in the donor basin, as well as the absence of an environmental management plan of the region.                                                                                                                                                                                                |
| <b>Temacapulín</b>                                         | Social actor  | As one of the central actors of the conflict, Temacapulín's representatives have always been against the Zapotillo dam to protect their communities from forced displacement.                                                                                                                                                                                                                                                                                                |
| <b>IMDEC</b>                                               | NGO           | IMDEC is an NGO that has been supporting the affected communities of Temacapulín, Acasico and Palmarejo since the start of the Zapotillo project.                                                                                                                                                                                                                                                                                                                            |
| <b>Colectivo COA</b>                                       | NGO           | This NGO specializes in legal support for affected communities of large projects. As such, they have provided legal support to Temacapulín, Acasico and Palmarejo.                                                                                                                                                                                                                                                                                                           |
| <b>Animal farmers' associations of Los Altos</b>           | Social actor  | Some associations from Los Altos have publicly been against the water transfer, arguing that the region is already affected by water scarcity, but not necessarily against the dam. They lack consensus among the many municipalities within the region.                                                                                                                                                                                                                     |
| <b>Observatory</b>                                         | Social actor  | Although recently created, the Observatory has been adamantly against the water transfer, arguing that the donor basin is already affected by water scarcity and that the region is the most important producer of animal protein in the country. The Observatory's members have changed over time, but some of its core members are representatives of University of Guadalajara, Animal Farmers Associations of Los Altos, representatives of the catholic church from Los |

|                                                           |                    |                                                                                                                                                                                                                                                                                                                                                               |
|-----------------------------------------------------------|--------------------|---------------------------------------------------------------------------------------------------------------------------------------------------------------------------------------------------------------------------------------------------------------------------------------------------------------------------------------------------------------|
|                                                           |                    | Altos, business and industry associations, local universities (ITESO, UNIVA), and civil society organizations.                                                                                                                                                                                                                                                |
| <b>Universidad Panamericana</b>                           | Academy            | This university has publicly released their position in favour of the project, arguing that it is key to the water security for Guadalajara, León and Los Altos.                                                                                                                                                                                              |
| <b>Universidad Autónoma de Guadalajara</b>                | Academy            | This university has publicly released their position in favour of the project, arguing that domestic use has priority over other kinds of uses.                                                                                                                                                                                                               |
| <b>Chamber of the industry of construction of Jalisco</b> | Social actor       | This actor has publicly released their position in favour of the project, arguing that the benefit of the majorities should prevail over the benefit of the minorities.                                                                                                                                                                                       |
| <b>College of civil engineers of Jalisco</b>              | Social actor       | This actor has publicly released their position in favour of the project, arguing that it is the only feasible solution to guarantee water supply to Guadalajara, León and Los Altos.                                                                                                                                                                         |
| <b>SIAPA</b>                                              | Government         | Guadalajara's water utility has publicly declared its support to the project as a key element in the city's water security.                                                                                                                                                                                                                                   |
| <b>Jalisco's government and State water authority</b>     | Government         | Its position has changed over time from supporting different configurations of the Zapotillo project, but always supported the project.                                                                                                                                                                                                                       |
| <b>Conagua</b>                                            | Federal government | The official position has changed from implicitly favoring the project to being neutral when the latest administration and presidency took over (December 2018).                                                                                                                                                                                              |
| <b>IMTA</b>                                               | Government         | The official position has changed from implicitly favoring the project to being neutral when the latest administration and presidency took over (December 2018).                                                                                                                                                                                              |
| <b>Municipality of Cañadas de Obregón</b>                 | Government         | This is the municipality where the Zapotillo dam is located. Because the duration of local administrations lasts only three years, there has been many administrations throughout the conflict. Some mayors have shown support for the communities of Temacapulín, Acasico and Palmarejo, while others have remained neutral, or at least kept a low profile. |

### Supplementary material 3. Detailed information of the UNOPS' Verde River Basin model.

UNOPS model of the Verde River basin is developed in WEAP software. This is a water planning software, functioning with the principle of water balance accounting. The software analyses the diverse water supply sources, as well as the withdrawal and transmission to water demand nodes. To start the analysis the software needs a "time frame, spatial boundary, system components and the configuration of the problem." (WEAP, 2020). The software uses two main features to analyze the water resources system. One, called 'Current accounts' analyses the present water demand, resources and supplies based on economic, demographic, hydrological trends to present a snapshot of a business-as-usual scenario. The other explores scenarios to evaluate different strategies such as supply augmentation or demand management.

To create the model, it is necessary to delimit the area and establish the system boundaries. UNOPS first delimited the study area to that of the Verde River Basin, which was 21,495 km<sup>2</sup>. The main natural variables that condition the models is percolation, precipitation, run-off, evapotranspiration, infiltration and interflow, while the variables derived from manmade interventions are reservoirs, groundwater draft, water transfers, water demand, derived flows and return flows. UNOPS used the data of Table S3 to fill these variables. The basic parameters used by WEAP are the monthly variation of demand, climate data, and then uses the MABIA water balance method to compute the water balance. This method is based on the two-bucket structure that processes the root zone as the top bucket and what is below the root zone as the bottom bucket (representing groundwater). The model proceeds to process 8 necessary steps to compute the water balance: 1) reference evapotranspiration, 2) soil water capacity, 3) basal crop coefficient, 4) evaporation coefficient, 5) potential and actual crop evapotranspiration, 6) water balance of the root zone, 7) irrigation, and 8) yield. Groundwater is calculated through nodes that compute the natural recharge flows (the top bucket), demand returns, infiltration losses from aqueducts and reservoirs and river recharges as flows that replenish the groundwater storage, and groundwater draft and base flows are computed as flows that deplete groundwater storage.

Then, since the software is configured to create semi-distributed models, UNOPS created 18 sub-regions that were characterized by a similar climate by using data mentioned in Table S3 through GIS extrapolation procedures. To ascertain the validity of all this sub-regions, UNOPS integrated the following data layers of all 18 sub-regions: 1) the hydrographic network, 2) the artificial regulation and monitoring system (dams, sluices and hydrometric stations), 3) the overlaps of the limits of aquifers with the density of surface and groundwater extractions, 4) soil and land cover characteristics, and the climatic distribution within the basin (UNOPS, 2017).

For the first layer, UNOPS used specialized algorithms to process in a digital elevation model a hydrographic network. For the second layer, the model used CONAGUA's observed data of 7 reservoirs (flows, volume and storage levels) and 8 hydrometric stations; this data was used to calibrate the model. For the third layers, CONAGUA's georeferenced database of water rights (REPDA) was used to determine hotspot areas of groundwater draft. With the fourth layer the model was able to process the relation with the upper and bottom buckets of the MABIA water balance method, and used SGM's, SSN's, INEGI's and CONAFOR's data for the soil characteristics, and CLCICOM's and INIFAP's data for the climatic distribution.

**Table S3. UNOPS' Verde River Basin model variables (source: UNOPS, 2017).**

|                                            | <b>Source</b>                                                                                                                                        | <b>Spatial resolution</b>                                                                             | <b>Temporal resolution</b> |
|--------------------------------------------|------------------------------------------------------------------------------------------------------------------------------------------------------|-------------------------------------------------------------------------------------------------------|----------------------------|
| <b>Climate</b>                             | CLCICOM<br>(CONAGUA-SMN)                                                                                                                             | 315 stations including a buffer of 50 km outside the contour of the basin                             | Daily (1943-2014)          |
| <b>Hydroclimatology</b>                    | INIFAP                                                                                                                                               | 105 stations including a buffer of 50 km outside the contour of the basin                             | Monthly (2002-2014)        |
| <b>Hydrometry in rivers and reservoirs</b> | BANDAS<br>(CONAGUA)                                                                                                                                  | Timeseries of 8 hydrometric stations                                                                  | 1941-2016                  |
| <b>Groundwater</b>                         | CONAGUA                                                                                                                                              | Studies of 21 aquifers of the region.                                                                 | 1997-2010                  |
|                                            | GRACE (GFZ German Research Centre for Geosciences, Center for Space Research - The University of Texas at Austin and NASA Jet Propulsion Laboratory) | Monthly fields with gravity coefficients at a spatial resolution of 1°x1° (≈ 11,000 km <sup>2</sup> ) | 2002-2014                  |
| <b>Soil and Land cover</b>                 | INEGI, CONAFOR                                                                                                                                       | Land cover maps 1:50,000, irrigation district maps 1:250,000, and images of SPOT 6 and 7              | 2012-2016                  |
| <b>Water demand</b>                        | REPDA<br>(CONAGUA)                                                                                                                                   | All georeferenced surface and groundwater rights                                                      | 2016                       |
| <b>Geology</b>                             | SGM, SSN                                                                                                                                             | Maps 1:50,000 and 1:250,000                                                                           | 2007                       |
| <b>Population/returns</b>                  | INEGI                                                                                                                                                | Population of towns with more than 2,500 people                                                       | 2010                       |
| <b>Digital Elevation Model</b>             | CEM v2.0                                                                                                                                             | Raster with resolution of 15m (1:20000)                                                               | 2013                       |

## Reference

UNOPS: 13. Modelación hidrológica de la cuenca. Available at: <http://201.131.6.193:8001/JaliscoSostenible/informe/>, 2017.

WEAP: General Area Parameters. Available at: <https://www.weap21.org/WebHelp/index.html>, 2020.
